# Supplementary material for: Epigenetic Upregulation of lncRNAs at 13q14.3 in Leukemia Is Linked to the In Cis Downregulation of a Gene Cluster That Targets NF-kB
Source: PLOS journal article supplement (doi:10.1371/journal.pgen.1003373), 2013-04-04
Supplement: S8 (10.1371/journal.pgen.1003373.s008) [file journal.pgen.1003373.s008]

Table S2: Characteristics of healthy donor cohort (n=43)

|                    |                           |            |
|--------------------|---------------------------|------------|
| Median age [years] |                           | 56 (23-67) |
| Sex                | female                    | 10         |
|                    | male                      | 27         |
|                    | NA                        | 6          |
| Analysis           | aPRIMES                   | 9          |
|                    | BioCOBRA/Sequenom         | 19         |
|                    | expression/MCIP/CTCF ChIP | 9          |
|                    | histone CHIP              | 6          |
